# Supplementary material for: Extracellular vesicles from apoptotic BMSCs ameliorate osteoporosis via transporting regenerative signals
Source: PubMed Central journal article supplement (PMC11209718; doi:10.7150/thno.96174), 2024-06-03
Supplement: thnov14p3583s1.pdf [file thnov14p3583s1.pdf]

# Supplementary Information

## Extracellular vesicles from apoptotic BMSCs ameliorate osteoporosis via transporting regenerative signals

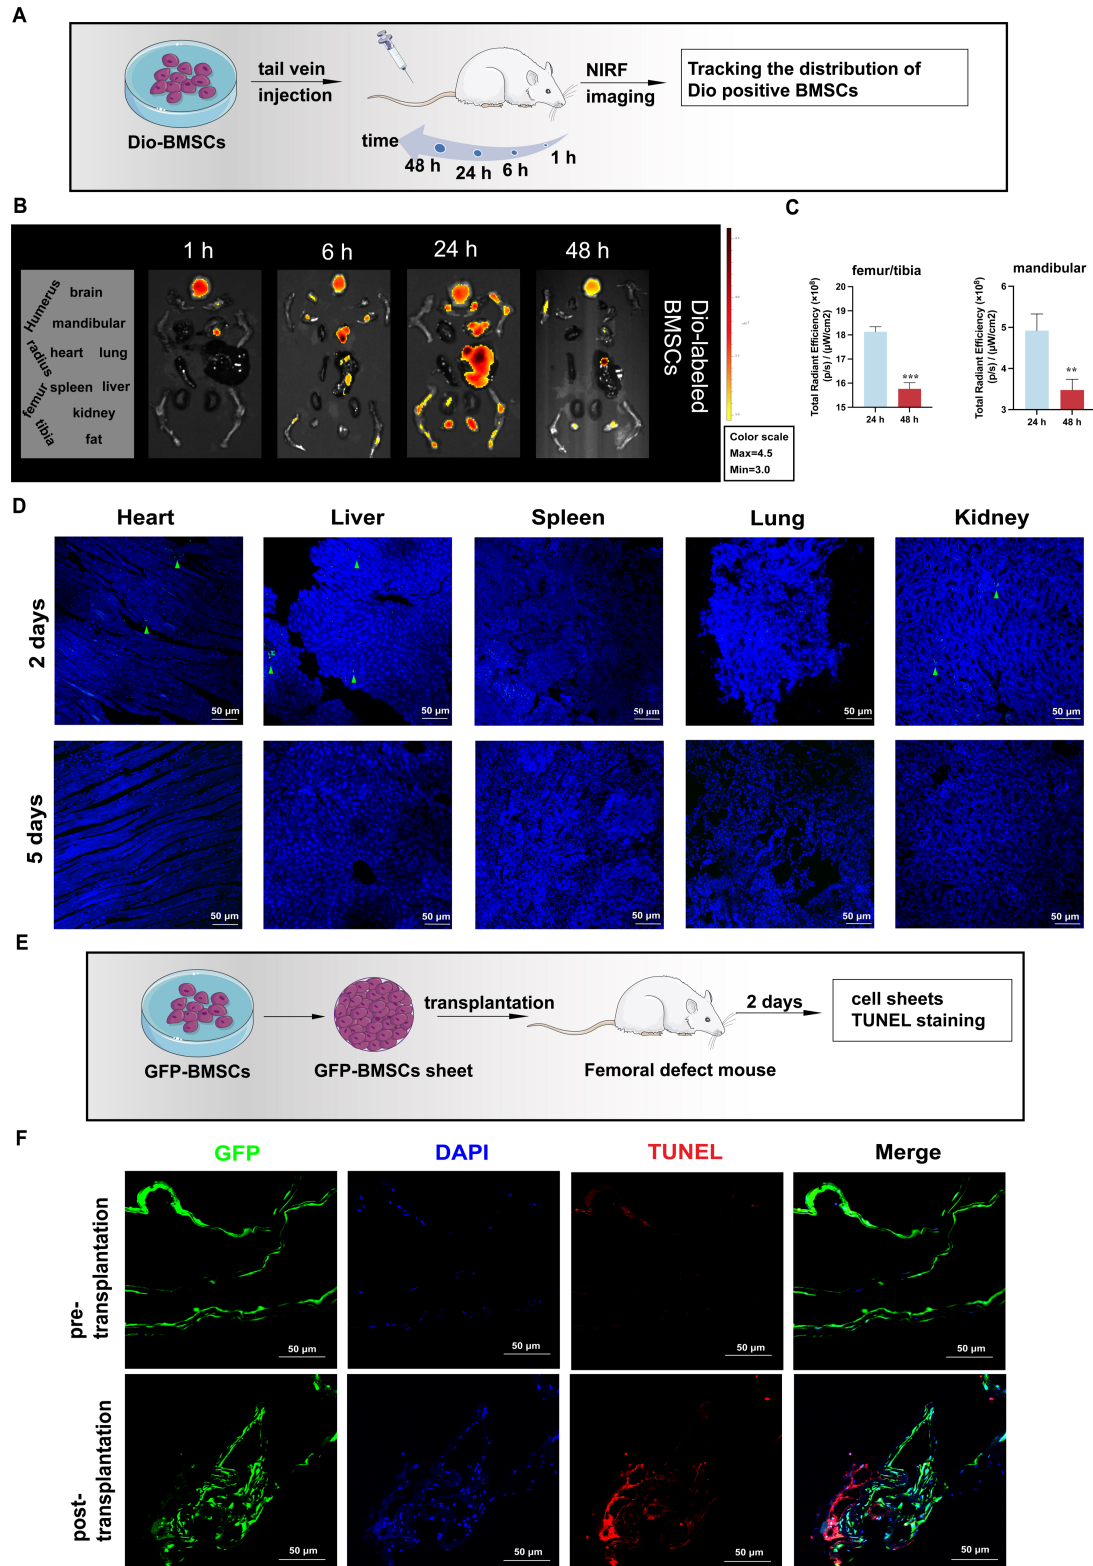

**Figure S1. BMSCs undergo apoptosis post-transplantation.** (A) Schematic diagram outlining the experimental design for tracking the fate of BMSCs post-transplantation. (B) Fluorescence images depicting major organs at 1 h, 6 h, 24 h, and 48 h after injection of Dio-labeled BMSCs. (C) Analysis Fluorescence intensity in femur/tibia and mandibula 24 h and 48 h after injection of Dio-labeled BMSCs. (D) Confocal assay of ZsGreen-BMSCs distribution in various organs (heart, liver, spleen, lung, kidney) after 2 and 5 days of tail vein injection of ZsGreen-BMSCs. Scale bar: 50  $\mu\text{m}$ . (E) Schematic diagram illustrating the experimental design for detecting the apoptosis of GFP-BMSCs post-transplantation into femoral defect mice. (F) TUNEL staining showing GFP<sup>+</sup> BMSCs undergo apoptosis. Scale bar: 50  $\mu\text{m}$ . Data are means  $\pm$  SEMs. Statistical significance was determined by a two-tailed paired t-test in (C). \*\*P < 0.01, \*\*\*P < 0.001.

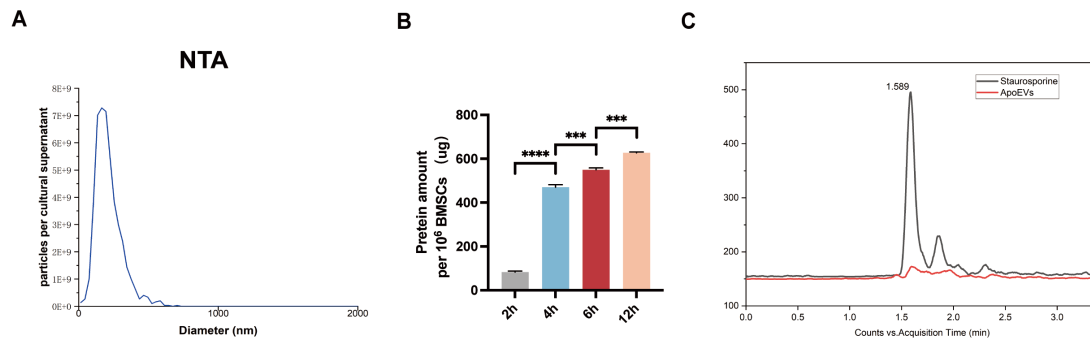

**Figure S2. Identifying of ApoEVs.** (A) NTA showed the diameter range and nanoparticles of ApoEVs. (B) BCA detects the protein amount of ApoEVs from  $1 \times 10^6$  BMSCs after STS inducing apoptosis at different times. (C) HPLC-MS/MS showed no STS residue in the extracted ApoEVs compared to the positive control group containing only STS drugs. \*\*\*P < 0.001.

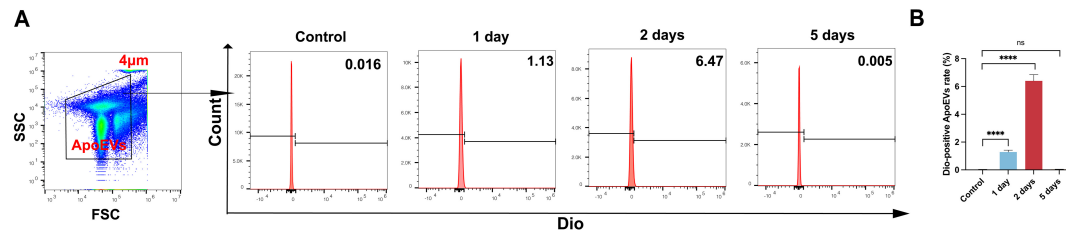

**Figure S3. ApoEVs production at different times after tail vein injection of Dio-BMSCs.** (A-B) The Dio-labeled ApoEVs were detected by FCM after Dio-BMSCs were injected at different times. Not significant (ns) = P > 0.05, \*\*\*\*P < 0.0001.

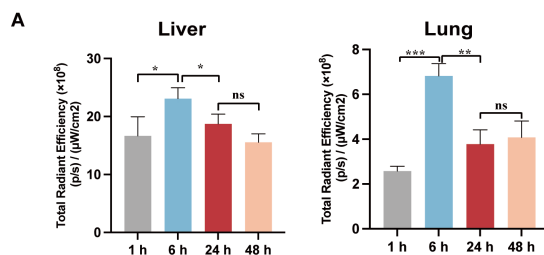

**Figure S4. ApoEVs accumulate in liver and lung.** (A) Fluorescence intensity analysis of the liver and lungs at 1 h, 6 h, 24 h, and 48 h after injection of Dio-labeled ApoEVs. Data are means  $\pm$  SEMs. Statistical significance was determined by a two-tailed paired t-test in (A). Not significant (ns) = P > 0.05, \*P < 0.05, \*\*P < 0.01, \*\*\*P < 0.001.



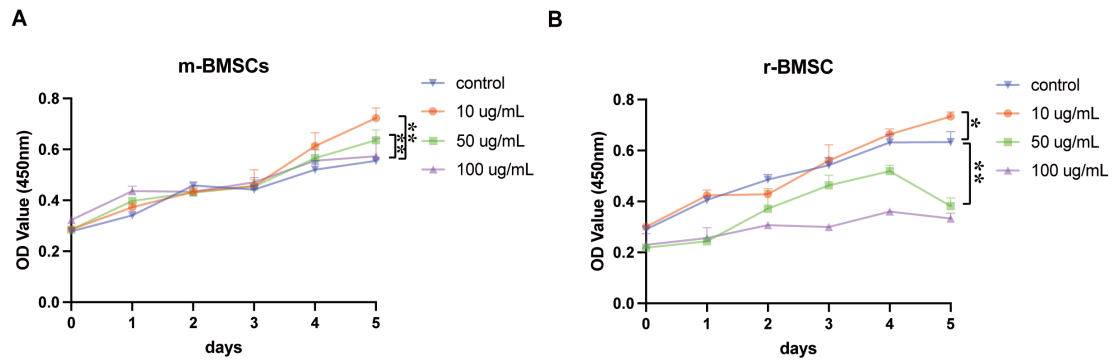

**Figure S5. ApoEVs promoted the proliferation of BMSCs in low concentrations.** (A) The effect of 10  $\mu\text{g/mL}$ , 50  $\mu\text{g/mL}$  and 100  $\mu\text{g/mL}$  ApoEVs on the proliferation ability of m-BMSCs. (B) The effect of 10  $\mu\text{g/mL}$ , 50  $\mu\text{g/mL}$ , and 100  $\mu\text{g/mL}$  ApoEVs on the proliferation ability of r-BMSCs. \* $P < 0.05$ , \*\* $P < 0.01$ .

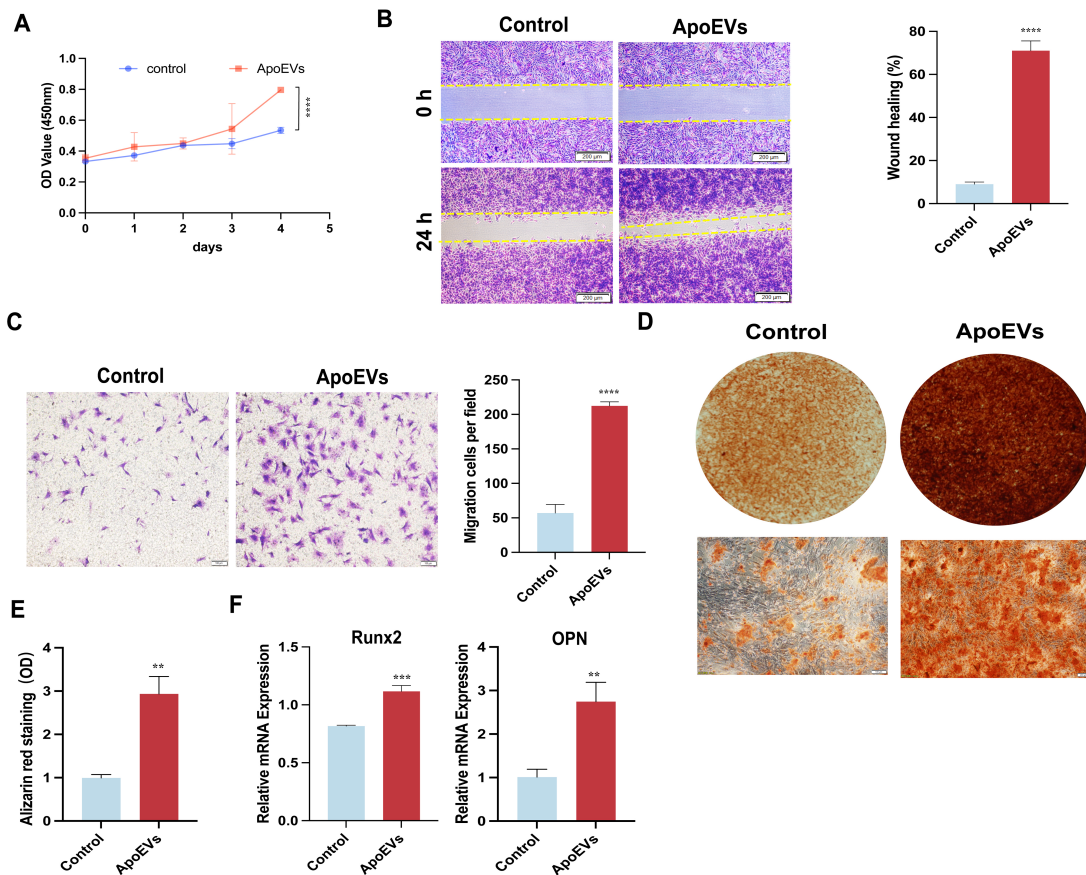

**Figure S6. The effect of ApoEVs on the proliferation, migration, and osteogenic differentiation of r-BMSCs.** (A) The effect of ApoEVs on the proliferation ability of BMSCs was measured by the CCK-8 assay. (B) Scratch healing assay and transwell assay (C) illustrate the effect of ApoEVs on the migration and invasion ability of BMSCs. Scale bar: 200  $\mu\text{m}$  (B), and 100  $\mu\text{m}$  (C). (D-E) ApoEVs increased the mineralized nodule formation of BMSCs during osteogenic induction, as assessed by alizarin red staining. Scale bar: 100  $\mu\text{m}$  (F) ApoEVs from r-BMSCs promote the expression of Runx2 and OPN, as assessed by qRT-PCR. Data are means  $\pm$  SEMs. Statistical significance was determined by a two-tailed paired t-test in (A, B, C, E, F). Not significant (ns) =  $P > 0.05$ , \* $P < 0.05$ , \*\* $P < 0.01$ , \*\*\* $P < 0.001$ , \*\*\*\* $P < 0.0001$ .

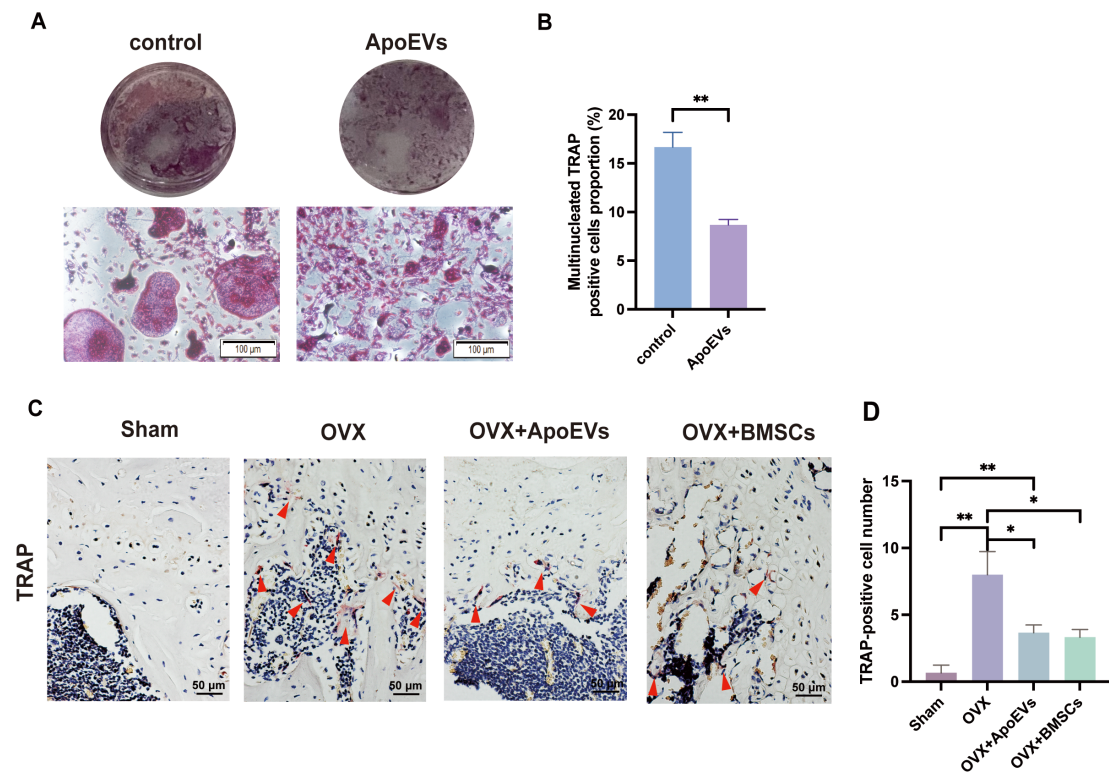

**Figure S7. The effect of ApoEVs on osteoclasts. (A-B)** Trap stain showed that ApoEVs inhibit osteoclast formation. Scale bar: 100  $\mu$ m. **(C-D)** ApoEVs inhibit bone resorption as assessed by Trap-stained femur slices. Scale bar: 50  $\mu$ m. \* $P < 0.05$ , \*\* $P < 0.01$ .

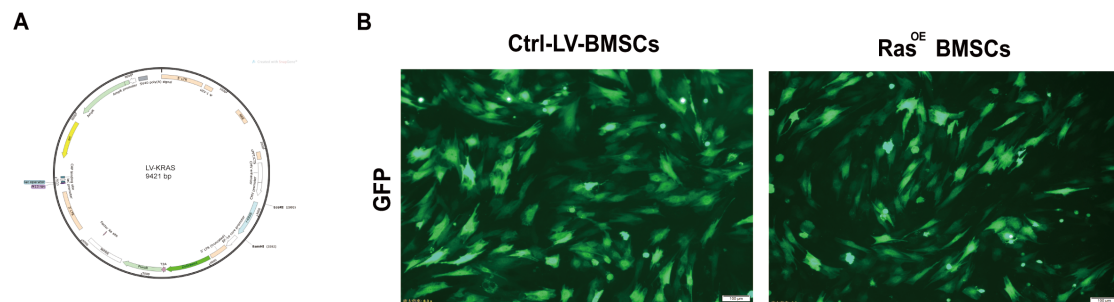

**Figure S8. Ras lentivirus successfully transfected into BMSCs. (A)** Schematic diagram outlining the gene targeting strategy for generating Ras overexpression in lentivirus. **(B)** GFP-Ras lentivirus successfully transfected into BMSCs. Scale bar: 100  $\mu$ m.

**Table S1.** The sequences of the qRT-PCR primers.

| Gene         | Forward primer sequence 5'→3' | Reverse primer sequence 5'→3' |
|--------------|-------------------------------|-------------------------------|
| <b>Mouse</b> |                               |                               |
| ALP          | TTGTGCCAGAGAAAGAGA            | GTTTCAGGGCATTTCCTCAAGGT       |
| RUNX2        | CCGCACGACAACCGCACCAT          | CGCTCCGGCCCCACAATCTC          |
| OCN          | CTGACAAAGCCTTCATGTCCAA        | GCGCCGGAGTCTGTTCCTACTA        |

|            |                                    |                                   |
|------------|------------------------------------|-----------------------------------|
| Ras        | GCTCACCATCCAGTTCATCCAGTC           | GGCTGCTCTGTCATCTATCACACAC         |
| Raf1       | CAGATGTGGCACGGAGCAACC              | CTCGGACTGTAACTCCACACCTTG          |
| MEK        | TCATCTGGAGATCAAACCCGCAATC          | CCATCGCTGTAGAACGCACCATAG          |
| ERK1/2     | CCACCTGTGAAGAATGAACT               | CACCTTTCTCTGTCTTTATCGT            |
| Ki67       | CACAGAGAACAAAGGTGTGAAG             | GGAGACTGCAGAGCTATTTTTG            |
| cyclinD2   | TGGGAAGTTTTGTTGGGTCA               | TCCTTGTCCAGGTAATGCCA              |
| CDK2       | CCTGCTTATCAATGCAGAGGG              | GTGCTGGGTACACACTAGGTG             |
| Gapdh      | AAGAAGGTGGTGAAGCAGGCATC            | CGGCATCGAAGGTGGAAGAGTG            |
| <b>Rat</b> |                                    |                                   |
| RUNX2      | TCATTTGCA <sub>s</sub> CTGGGTCACAT | TCTCAGCCATGTTTGTGCTC              |
| OPN        | AAGCGTGGAACACACAGC                 | CTTTGGA <sub>ACT</sub> CGCCTGACTG |
| Gapdh      | TATGACTCTACCCACGGCAAG              | TACTCAGCACCAGCATCACC              |

**Table S2.** The sequences of the siRNA primers.

| <b>Gene</b> | <b>Forward primer sequence 5'→3'</b> | <b>Reverse primer sequence 5'→3'</b> |
|-------------|--------------------------------------|--------------------------------------|
| siRNA NC    | UUCUCCGAACGUGUCACGUTT                | ACGUGACACGUUCGGAGAATT                |
| siRNA PC    | CCCUCACAAGAGGAUUGAATT                | UUCAAUCCUCUUGUGAGGGTT                |
| siKRAS      | CCAUUUAUAGAGAACAAAUUTT               | AAUUUGUUCUCUAUAAUGGTT                |
